# Supplementary material
Source: PubMed Central journal article supplement (PMC9067940)
Supplement: mmc1.pdf [file mmc1.pdf]

# THE LANCET

## Healthy Longevity

### Supplementary appendix

This appendix formed part of the original submission and has been peer reviewed. We post it as supplied by the authors.

Supplement to: Krutikov M, Stirrup O, Nacer-Laidi H, et al. Outcomes of SARS-CoV-2 omicron infection in residents of long-term care facilities in England (VIVALDI): a prospective, cohort study. *Lancet Health Longevity* 2022; **3**: e347–55.

# **Outcomes of SARS-CoV-2 Omicron infection in residents of Long-Term Care in England (VIVALDI): a prospective cohort study**

Maria Krutikov, Oliver Stirrup, Hadjer Nacer-Laidi, Borscha Azmi, Chris Fuller, Gokhan Tut, Tom Palmer, Madhumita Shrotri, Aidan Irwin-Singer, Verity Baynton, The COVID-19 Genomics UK (COG-UK) consortium\*, Andrew Hayward, Paul Moss, Andrew Copas, Laura Shallcross

## **Supplementary Appendix**

|                                                                                                                                                                                                 |           |
|-------------------------------------------------------------------------------------------------------------------------------------------------------------------------------------------------|-----------|
| <b>Additional methods</b> .....                                                                                                                                                                 | <b>2</b>  |
| Cohort selection.....                                                                                                                                                                           | 2         |
| Blood sampling procedures .....                                                                                                                                                                 | 2         |
| Data sources .....                                                                                                                                                                              | 2         |
| <b>Additional Figures &amp; Tables</b> .....                                                                                                                                                    | <b>3</b>  |
| Figure S1: Study flow chart.....                                                                                                                                                                | 3         |
| Figure S2: New SARS-CoV-2 cases amongst residents in LTCFs taking part in Vivaldi study between September 1, 2021 and February 1, 2022 according to date of test and variant (where known)..... | 4         |
| Table S1: Baseline characteristics for care home residents with Omicron versus Delta (based on SGTF or lineage data).....                                                                       | 5         |
| Table S2: Comparison of cohorts of participants for whom SGTF / sequencing data are available with those for whom these data were unavailable .....                                             | 6         |
| Table S3: Cox proportional Hazards models for hospitalisation within 14 days from positive test for SARS-CoV-2 with interaction terms in the full cohort. ....                                  | 8         |
| <b>COG-UK authorship list</b> .....                                                                                                                                                             | <b>9</b>  |
| <b>References</b> .....                                                                                                                                                                         | <b>18</b> |
| <b>STROBE Checklist</b> .....                                                                                                                                                                   | <b>19</b> |

## **Additional methods**

### **Cohort selection**

Results of PCR or LFD tests that are performed as part of the national testing programme are linked to the individual's unique National Health Service (NHS) number and to the unique identifier of the LTCF, which is allocated to them by the Care Quality Commission (CQC), the national social care regulatory body. Using these results, residents that reside within LTCFs that are taking part in the VIVALDI study can be identified. A unique pseudo-identifier is created for each resident with a test based on their NHS number and enables linkage to other routinely collected pseudonymised datasets.

### **Blood sampling procedures**

Following written informed consent, up to six sequential serum blood samples have been collected from a subset of study participants between June 11, 2020, and January 17, 2022. <sup>1</sup> These samples undergo testing for SARS-CoV-2 anti-nucleocapsid IgG antibody using the Abbott ARCHITECT i-System immunoassay (Abbott, Maidenhead, UK) at the Doctor's Laboratory in London UK. Results are defined as positive if greater than an index value of 1.4 (as recommended by the manufacturer).

### **Data sources**

*COVID-19 testing data:* Results of SARS-CoV-2 PCR and LFD testing performed as part of the national testing programme within LTCFs and hospitals are stored with demographic details and CQC identifier. Residents who tested positive for SARS-CoV-2 on PCR or LFD between September 1, 2021, and January 17, 2022 were eligible for inclusion. Positive LFD and / or PCR tests occurring within 28 days of each other were excluded and the earliest sample prioritised for inclusion. Only one infection episode per participant was included. Due to national shortages of PCR tests over December 2021 and January 2022, we included both positive LFD and PCR tests to optimise the capture of infections within our population.

*Hospital Episode Statistics Admitted Patient Care (HES APC):* Maintained by NHS Digital, this dataset details all admissions to NHS hospitals in England. The dataset is updated daily with dates of admission and discharge and monthly with diagnostic codes. <sup>2</sup>

*National mortality dataset:* Maintained by the Office for National Statistics (ONS), this dataset contains dates and causes of death for people in England as recorded on death certification. It is estimated that there can be a lag of up to two weeks in reporting, collecting and coding deaths.

*National Immunisation Management System (NIMS):* Maintained by NHS England and used for national reporting of vaccination coverage, demographic details of all individuals registered with a GP in England alongside details of all COVID-19 vaccinations administered in England are recorded in this dataset which is updated daily. <sup>3</sup>

*Capacity Tracker:* Established by North of England Commissioning Support (NECS) NHS England, this is an online tool that is completed on a daily basis by LTCFs and was established in response to the COVID-19 pandemic to enable LTCFs to report capacity issues. <sup>4</sup>

*S-gene results:* PCR testing conducted in LTCFs is conducted in a network of accredited laboratories in England, approximately 60% of which use the TaqPath assay (Thermo Fisher Scientific) to detect spike (S), nucleocapsid (N), and open reading frame 1ab (ORF1ab) gene targets. Results are uploaded to the National Pathology exchange (NPEx) database. Using the sample ID number, Cycle threshold (Ct) values were retrieved for positive samples in our cohort. <sup>5</sup>

*Sequencing results:* As part of the genomic surveillance programme in England, a subset of samples from the national testing programme with detectable SARS-CoV-2 DNA detected on PCR testing are selected for sequencing. Where available, the PANGO lineage assignments for samples included in the study cohort were retrieved from the COG-UK data repository where results are stored. <sup>6</sup>

## Additional Figures & Tables

Figure S1: Study flow chart

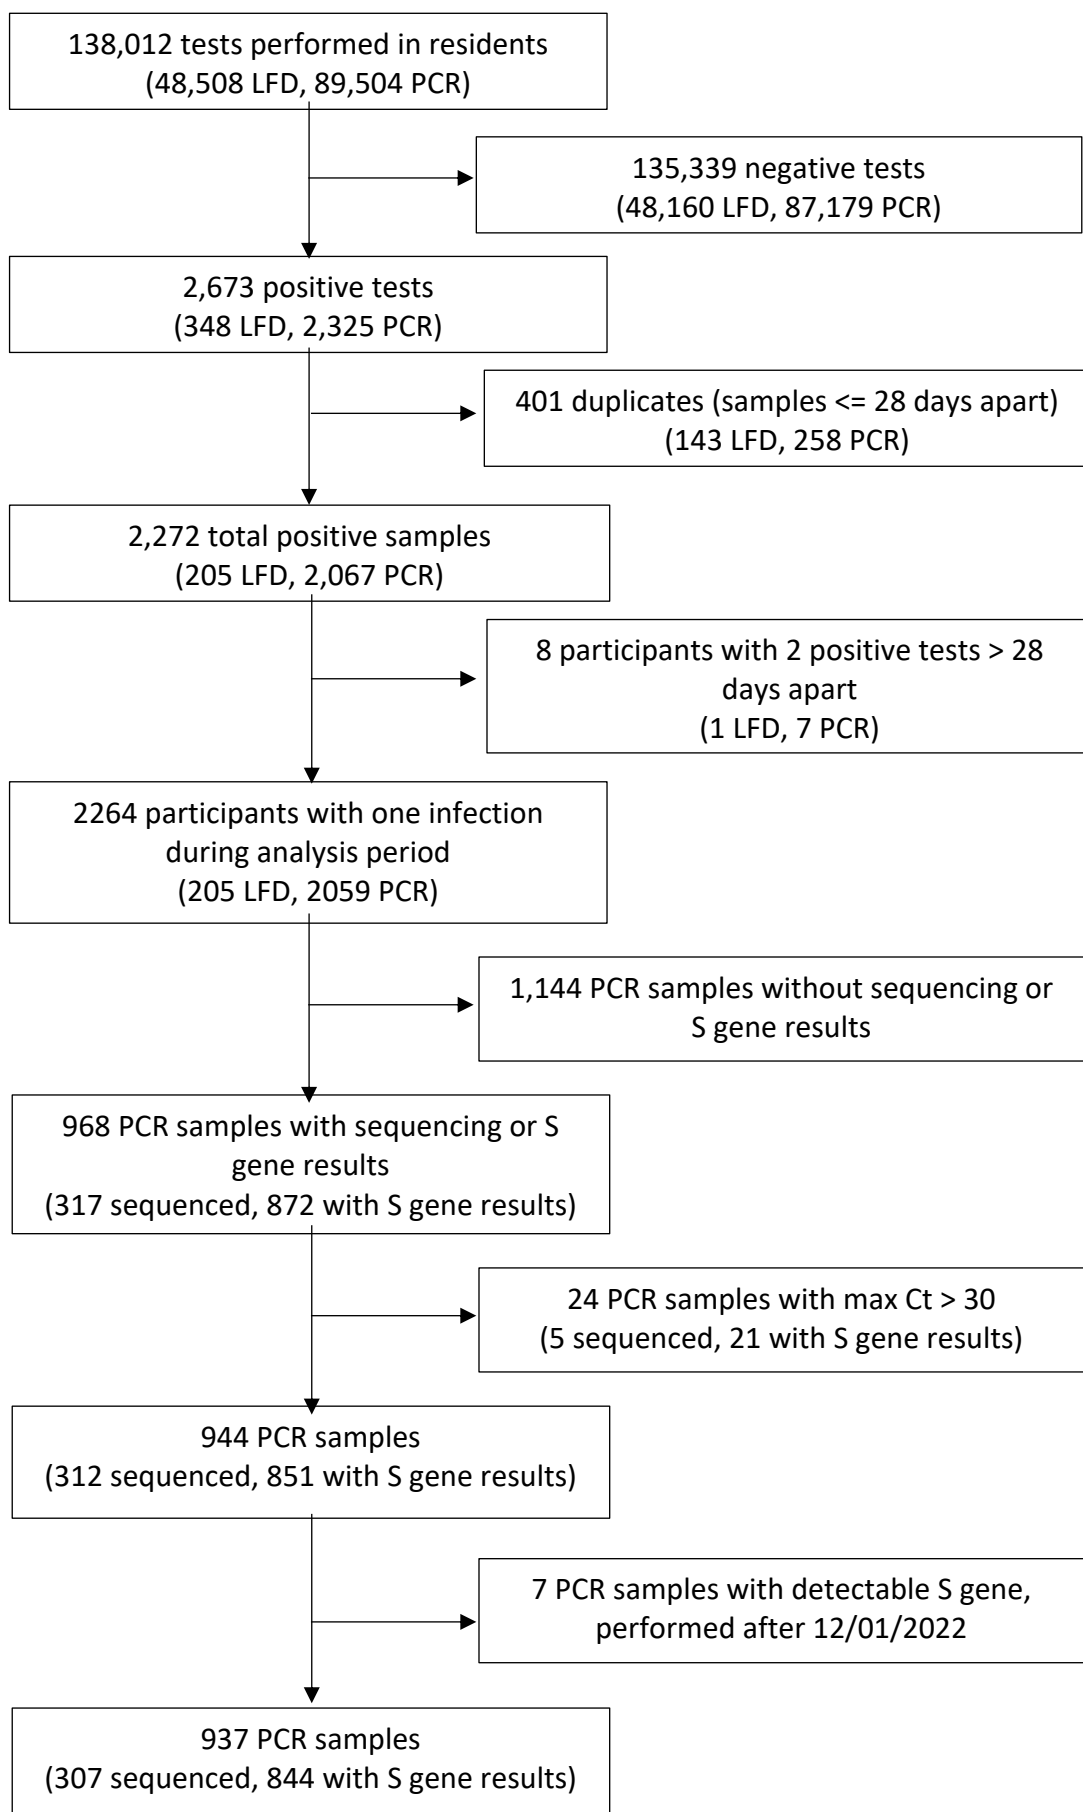

**Pre-Omicron (01 Sept – 12 Dec 2021):**

456,301 tests performed in total (226343 (49.6%) LFD, 229958 (50.4%) PCR)  
98650 (21.6% of all tests performed) were unlinked of which 26532 (26.9%) LFD and 72118 (73.1%) PCR

During this period there were 26532/226343 (11.72%) unlinked LFD tests and 72118/229958 (31.36%) unlinked PCR tests in residents

**Omicron period (13 Dec 2021 – 1 Feb 2022):**

338932 tests performed in total (119258 (58.8%) LFD , 139674 (41.2%) PCR)  
60434 (17.8% of all tests performed) were unlinked of which 18425 (30.5%) LFD and 42009 (69.5%) PCR

During this period there were 18425/119258 (15.45%) unlinked LFD tests and 42009/139674 (30.08%) unlinked PCR tests in residents

**Figure S2: New SARS-CoV-2 cases amongst residents in LTCFs taking part in Vivaldi study between September 1, 2021 and February 1, 2022 according to date of test and variant (where known).** The vertical line is set at the date when the first Omicron case was detected in this population (December 13, 2021).

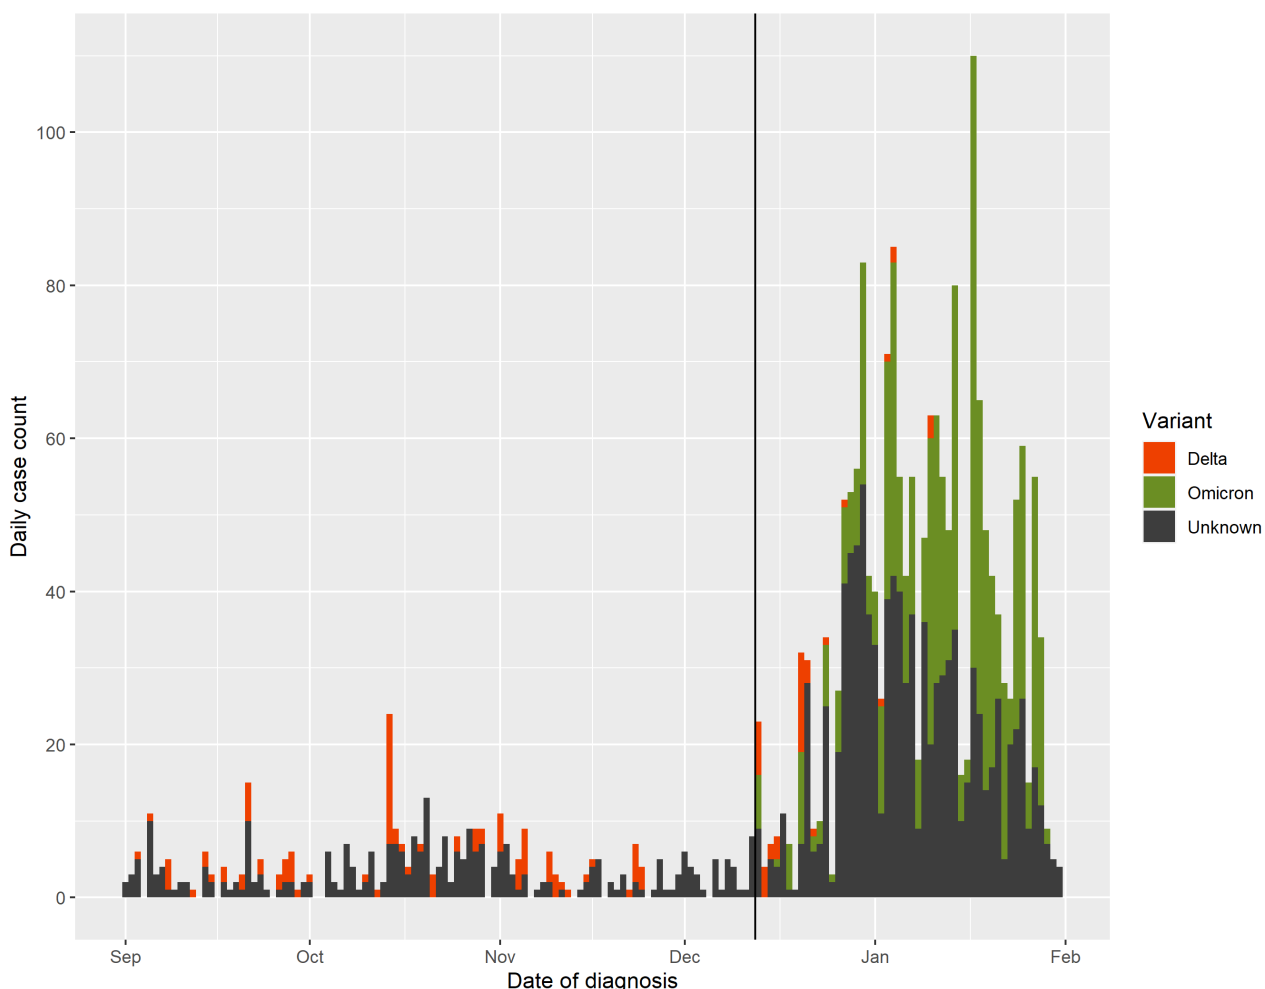

**Table S1: Baseline characteristics for care home residents with Omicron versus Delta (based on SGTF or lineage data)**

|                                                             | Delta                        | Omicron                      | P value <sup>^</sup> |
|-------------------------------------------------------------|------------------------------|------------------------------|----------------------|
| <b>Total</b>                                                | 143                          | 794                          |                      |
| <b>Age (IQR, range)</b>                                     | 85·1 (77·9-91·6, 66·0-102·8) | 85·2 (79·0-90·6, 60·0-104·7) | 0·958                |
| <b>Sex</b>                                                  |                              |                              | 0·347                |
| Female                                                      | 96 (67·1)                    | 564 (71·0)                   |                      |
| Male                                                        | 47 (32·9)                    | 230 (29·0)                   |                      |
| <b>Primary vaccine course</b>                               |                              |                              | 0·37                 |
| AstraZeneca ChAdOx1                                         | 72 (50·3)                    | 422 (53·1)                   |                      |
| Pfizer BNT162b2                                             | 41 (28·7)                    | 251 (31·6)                   |                      |
| Not recorded                                                | 7 (4·9)                      | 32 (4·0)                     |                      |
| Unvaccinated                                                | 23 (16·1)                    | 89 (11·2)                    |                      |
| <b>Booster vaccination status<sup>±</sup></b>               |                              |                              |                      |
| Booster > 1 week before positive test                       | 52 (36·4)                    | 611 (77·0)                   | <0·0001              |
| Days from booster to positive test (IQR, range)             | 39 (10-72, 1-89)             | 90 (72-103, 1-265)           |                      |
| <b>Infection history</b>                                    |                              |                              |                      |
| Any evidence of past infection                              | 4 (2·8)                      | 87 (11·0)                    | <0·0001              |
| Previous positive PCR or LFD                                | 2 (1·4)                      | 53 (6·7)                     | 0·013                |
| SARS-CoV-2 antibodies                                       | 0 (0·0)                      | 0 (0·0)                      | NA                   |
| Prior COVID-19 hospital admission                           | 2 (1·4)                      | 45 (5·7)                     | 0·031                |
| <b>Any Hospital Admission with 14 days of positive test</b> | 14 (9·8)                     | 32 (4·0)                     | <0·0001              |
| <b>COVID-19 deaths<sup>#</sup></b>                          | 18 (12·6)                    | 38 (4·8)                     | <0·0001              |
| <b>Number of care home beds (IQR, range)</b>                | 59 (44-69, 24-127)           | 60 (46-80, 23-149)           |                      |

<sup>#</sup>COVID-19 deaths defined as death within 28 days of PCR or COVID-19 recorded on death certificate.

<sup>±</sup>Booster vaccinations shown for entire study cohort, regardless of primary vaccination status

<sup>^</sup> Chi-square for categorical variables and Mann-Whitney test for continuous variables for difference between Omicron and Delta group

**Table S2: Comparison of cohorts of participants for whom SGTF / sequencing data are available with those for whom these data were unavailable**

|                                                         | All infections               | SGTF / lineage available     | SGTF / lineage unavailable   | p value ^ |
|---------------------------------------------------------|------------------------------|------------------------------|------------------------------|-----------|
| <b>Total</b>                                            | 2264                         | 885                          | 1379                         |           |
| <b>Age (IQR, range)</b>                                 | 84.5 (77.9-90.0, 53.0-105.0) | 85.0 (78.7-90.6, 60.0-104.7) | 84.3 (77.2-89.8, 53.0-105.0) | <0.0001   |
| <b>Sex</b>                                              |                              |                              |                              | 0.147     |
| Female                                                  | 1559 (68.9)                  | 625 (70.6)                   | 934 (67.7)                   |           |
| Male                                                    | 705 (31.1)                   | 260 (29.4)                   | 445 (32.3)                   |           |
| <b>Time period of positive test</b>                     |                              |                              |                              | <0.0001   |
| Pre-Omicron: September 1, 2021 - December 12, 2021      | 400 (17.7)                   | 102 (11.5)                   | 298 (21.6)                   |           |
| Omicron: December 13, 2021 - February 1, 2022           | 1864 (82.3)                  | 783 (88.5)                   | 1081 (78.4)                  |           |
| <b>Primary vaccine course</b>                           |                              |                              |                              | 0.20      |
| AstraZeneca ChAdOx1                                     | 1189 (52.5)                  | 461 (52.1)                   | 728 (52.8)                   |           |
| Pfizer BNT162b2                                         | 676 (29.9)                   | 283 (32.0)                   | 393 (28.5)                   |           |
| Not recorded                                            | 97 (4.3)                     | 35 (4.0)                     | 62 (4.5)                     |           |
| Unvaccinated                                            | 302 (13.3)                   | 106 (12.0)                   | 196 (14.2)                   |           |
| <b>Booster vaccination status‡</b>                      |                              |                              |                              |           |
| Booster > 7 days before positive test                   | 1468 (64.8)                  | 647 (69.1)                   | 821 (61.9)                   | <0.0001   |
| Days from booster to positive test (IQR, range)         | 81 (63-98, 1-182)            | 87 (69-101, 1-127)           | 79 (60-95, 1-182)            | <0.0001   |
| <b>Infection history</b>                                |                              |                              |                              |           |
| Any evidence of past infection                          | 253 (11.2)                   | 82 (9.3)                     | 171 (12.4)                   | 0.021     |
| Previous positive PCR or LFD                            | 158 (7.0)                    | 47 (5.3)                     | 111 (8.0)                    | 0.013     |
| SARS-CoV-2 antibodies                                   | 27 (1.2)                     | 7 (0.8)                      | 20 (1.5)                     | 0.013     |
| Prior COVID-19 hospital admission                       | 110 (4.9)                    | 42 (4.7)                     | 68 (4.9)                     | 0.84      |
| <b>Hospital Admission with 14 days of positive test</b> |                              |                              |                              |           |
| Any                                                     | 126 (5.6)                    | 42 (4.7)                     | 84 (6.1)                     | 0.17      |
| Positive test September 1, 2021 - December 12, 2021     | 42 (10.5)                    | 6 (5.9)                      | 36 (12.1)                    | 0.078     |
| Positive test December 13, 2021 - February 1, 2022      | 84 (4.5)                     | 36 (4.6)                     | 48 (4.4)                     | 0.87      |
| <b>COVID-19 deaths#</b>                                 |                              |                              |                              |           |

|                                                     |                    |                    |                    |      |
|-----------------------------------------------------|--------------------|--------------------|--------------------|------|
| All                                                 | 150 (6·6)          | 56 (6·3)           | 94 (6·8)           | 0·65 |
| Positive test September 1, 2021 - December 12, 2021 | 51 (12·8)          | 13 (12·7)          | 38 (12·8)          | 1·00 |
| Positive test December 13, 2021 - February 1, 2022  | 99 (5·3)           | 43 (5·5)           | 56 (5·2)           | 0·77 |
| <b>Number of care home beds<br/>(IQR, range)</b>    | 59 (44-80, 17-149) | 60 (46-80, 23-149) | 59 (44-80, 17-149) |      |

*#COVID-19 deaths defined as death within 28 days of PCR or COVID-19 recorded on death certificate.*

*^ Chi-square for categorical variables and Mann-Whitney test for continuous variables for difference between “available SGTF/lineage” and “no available SGTF/lineage groups”*



**Table S3: Cox proportional Hazards models for hospitalisation within 14 days from positive test for SARS-CoV-2 with interaction terms in the full cohort.**

| Variable                                               | Adjusted HR                                     | 95% CI    | P value |
|--------------------------------------------------------|-------------------------------------------------|-----------|---------|
|                                                        | <b>Interaction with vaccine type (p=0.0324)</b> |           |         |
| <b>Sex</b>                                             |                                                 |           |         |
| Male                                                   | Ref                                             | -         | -       |
| Female                                                 | 0.57                                            | 0.40-0.81 | <0.0001 |
| <b>Age (per year increase)</b>                         | 1.03                                            | 1.01-1.05 | 0.012   |
| <b>Primary vaccine course</b>                          |                                                 |           | 0.47‡   |
| Unvaccinated                                           | Ref†                                            | -         | -       |
| AstraZeneca ChAdOx1                                    | 0.79†                                           | 0.34-1.81 | -       |
| Pfizer BNT162b2                                        | 1.37†                                           | 0.58-3.24 | -       |
| Type not known                                         | -‡                                              | -‡        | -       |
| <b>Period &amp; primary vaccine course interaction</b> |                                                 |           | 0.048‡  |
| Omicron vs Delta in unvaccinated group                 | 0.60                                            | 0.26-1.41 | -       |
| Omicron vs Delta in Pfizer BioNTech group              | 0.34                                            | 0.16-0.72 | -       |
| Omicron vs Delta in Oxford AstraZeneca group           | 0.85                                            | 0.46-1.56 | -       |
| Omicron vs Delta in unknown vaccine type group         | -‡                                              | -‡        | -       |
| <b>Booster vaccine status</b>                          |                                                 |           | 0.0008  |
| No booster                                             | Ref                                             | -         | -       |
| Booster more than 1 week before Dx                     | 0.50                                            | 0.31-0.82 | <0.0001 |
| <b>Past infection status</b>                           |                                                 |           |         |
| No past infection                                      | Ref                                             | -         | -       |
| Past infection                                         | 0.22                                            | 0.07-0.69 | <0.0001 |

† As reported for pre-Omicron period, but subject to multiplicative interaction term for the Omicron period.

‡ There were no hospital admissions among cases with vaccine 'type not known' in the pre-Omicron period, leading to a perfect prediction problem for model fitting. As such, coefficients cannot be estimated for this group, and the P-values presented are also calculated with omission of these coefficients

## COG-UK authorship list

### The COVID-19 Genomics UK (COG-UK) consortium June 2021 V.1

**Funding acquisition, Leadership and supervision, Metadata curation, Project administration, Samples and logistics, Sequencing and analysis, Software and analysis tools, and Visualisation:**

Dr Samuel C Robson PhD <sup>13,84</sup>

**Funding acquisition, Leadership and supervision, Metadata curation, Project administration, Samples and logistics, Sequencing and analysis, and Software and analysis tools:**

Dr Thomas R Connor PhD <sup>11,74</sup> and Prof Nicholas J Loman PhD <sup>43</sup>

**Leadership and supervision, Metadata curation, Project administration, Samples and logistics, Sequencing and analysis, Software and analysis tools, and Visualisation:**

Dr Tanya Golubchik PhD <sup>5</sup>

**Funding acquisition, Leadership and supervision, Metadata curation, Samples and logistics, Sequencing and analysis, and Visualisation:**

Dr Rocio T Martinez Nunez PhD <sup>46</sup>

**Funding acquisition, Leadership and supervision, Project administration, Samples and logistics, Sequencing and analysis, and Software and analysis tools:**

Dr David Bonsall PhD <sup>5</sup>

**Funding acquisition, Leadership and supervision, Project administration, Sequencing and analysis, Software and analysis tools, and Visualisation:**

Prof Andrew Rambaut DPhil <sup>104</sup>

**Funding acquisition, Metadata curation, Project administration, Samples and logistics, Sequencing and analysis, and Software and analysis tools:**

Dr Luke B Snell MSc, MBBS <sup>12</sup>

**Leadership and supervision, Metadata curation, Project administration, Samples and logistics, Software and analysis tools, and Visualisation:**

Rich Livett MSc <sup>116</sup>

**Funding acquisition, Leadership and supervision, Metadata curation, Project administration, and Samples and logistics:**

Dr Catherine Ludden PhD <sup>20,70</sup>

**Funding acquisition, Leadership and supervision, Metadata curation, Samples and logistics, and Sequencing and analysis:**

Dr Sally Corden PhD <sup>74</sup> and Dr Eleni Nastouli FRCPATH <sup>96,95,30</sup>

**Funding acquisition, Leadership and supervision, Metadata curation, Sequencing and analysis, and Software and analysis tools:**

Dr Gaia Nebbia PhD, FRCPATH <sup>12</sup>

**Funding acquisition, Leadership and supervision, Project administration, Samples and logistics, and Sequencing and analysis:**

Ian Johnston BSc <sup>116</sup>

**Leadership and supervision, Metadata curation, Project administration, Samples and logistics, and Sequencing and analysis:**

Prof Katrina Lythgoe PhD <sup>5</sup>, Dr M. Estee Torok FRCP <sup>19,20</sup> and Prof Ian G Goodfellow PhD <sup>24</sup>

**Leadership and supervision, Metadata curation, Project administration, Samples and logistics, and Visualisation:**

Dr Jacqui A Prieto PhD <sup>97,82</sup> and Dr Kordo Saeed MD, FRCPath <sup>97,83</sup>

**Leadership and supervision, Metadata curation, Project administration, Sequencing and analysis, and Software and analysis tools:**

Dr David K Jackson PhD <sup>116</sup>

**Leadership and supervision, Metadata curation, Samples and logistics, Sequencing and analysis, and Visualisation:**

Dr Catherine Houlihan PhD <sup>96,94</sup>

**Leadership and supervision, Metadata curation, Sequencing and analysis, Software and analysis tools, and Visualisation:**

Dr Dan Frampton PhD <sup>94,95</sup>

**Metadata curation, Project administration, Samples and logistics, Sequencing and analysis, and Software and analysis tools:**

Dr William L Hamilton PhD <sup>19</sup> and Dr Adam A Witney PhD <sup>41</sup>

**Funding acquisition, Samples and logistics, Sequencing and analysis, and Visualisation:**

Dr Giselda Bucca PhD <sup>101</sup>

**Funding acquisition, Leadership and supervision, Metadata curation, and Project administration:**

Dr Cassie F Pope PhD<sup>40,41</sup>

**Funding acquisition, Leadership and supervision, Metadata curation, and Samples and logistics:**

Dr Catherine Moore PhD <sup>74</sup>

**Funding acquisition, Leadership and supervision, Metadata curation, and Sequencing and analysis:**

Prof Emma C Thomson PhD, FRCP <sup>53</sup>

**Funding acquisition, Leadership and supervision, Project administration, and Samples and logistics:**

Dr Ewan M Harrison PhD <sup>116,102</sup>

**Funding acquisition, Leadership and supervision, Sequencing and analysis, and Visualisation:**

Prof Colin P Smith PhD <sup>101</sup>

**Leadership and supervision, Metadata curation, Project administration, and Sequencing and analysis:**

Fiona Rogan BSc <sup>77</sup>

**Leadership and supervision, Metadata curation, Project administration, and Samples and logistics:**

Shaun M Beckwith MSc <sup>6</sup>, Abigail Murray Degree <sup>6</sup>, Dawn Singleton HNC <sup>6</sup>, Dr Kirstine Eastick PhD, FRCPath <sup>37</sup>, Dr Liz A Sheridan PhD <sup>98</sup>, Paul Randell MSc, PgD <sup>99</sup>, Dr Leigh M Jackson PhD <sup>105</sup>, Dr Cristina V Ariani PhD <sup>116</sup> and Dr Sónia Gonçalves PhD <sup>116</sup>

**Leadership and supervision, Metadata curation, Samples and logistics, and Sequencing and analysis:**

Dr Derek J Fairley PhD <sup>3,77</sup>, Prof Matthew W Loose PhD <sup>18</sup> and Joanne Watkins MSc <sup>74</sup>

**Leadership and supervision, Metadata curation, Samples and logistics, and Visualisation:**

Dr Samuel Moses MD <sup>25,106</sup>

**Leadership and supervision, Metadata curation, Sequencing and analysis, and Software and analysis tools:**

Dr Sam Nicholls PhD <sup>43</sup>, Dr Matthew Bull PhD <sup>74</sup> and Dr Roberto Amato PhD <sup>116</sup>

**Leadership and supervision, Project administration, Samples and logistics, and Sequencing and analysis:**

Prof Darren L Smith PhD <sup>36,65,66</sup>

**Leadership and supervision, Sequencing and analysis, Software and analysis tools, and Visualisation:**

Prof David M Aanensen PhD <sup>14,116</sup> and Dr Jeffrey C Barrett PhD <sup>116</sup>

**Metadata curation, Project administration, Samples and logistics, and Sequencing and analysis:**

Dr Dinesh Aggarwal MRCP<sup>20,116,70</sup>, Dr James G Shepherd MBCHB, MRCP <sup>53</sup>, Dr Martin D Curran PhD <sup>71</sup> and Dr Surendra Parmar PhD <sup>71</sup>

**Metadata curation, Project administration, Sequencing and analysis, and Software and analysis tools:**

Dr Matthew D Parker PhD <sup>109</sup>

**Metadata curation, Samples and logistics, Sequencing and analysis, and Software and analysis tools:**

Dr Catryn Williams PhD <sup>74</sup>

**Metadata curation, Samples and logistics, Sequencing and analysis, and Visualisation:**

Dr Sharon Glaysher PhD <sup>68</sup>

**Metadata curation, Sequencing and analysis, Software and analysis tools, and Visualisation:**

Dr Anthony P Underwood PhD <sup>14,116</sup>, Dr Matthew Bashton PhD <sup>36,65</sup>, Dr Nicole Pacchiarini PhD <sup>74</sup>, Dr Katie F Loveson PhD <sup>84</sup> and Matthew Byott MSc <sup>95,96</sup>

**Project administration, Sequencing and analysis, Software and analysis tools, and Visualisation:**

Dr Alessandro M Carabelli PhD <sup>20</sup>

**Funding acquisition, Leadership and supervision, and Metadata curation:**

Dr Kate E Templeton PhD <sup>56,104</sup>

**Funding acquisition, Leadership and supervision, and Project administration:**

Dr Thushan I de Silva PhD <sup>109</sup>, Dr Dennis Wang PhD <sup>109</sup>, Dr Cordelia F Langford PhD <sup>116</sup> and John Sillitoe BEng <sup>116</sup>

**Funding acquisition, Leadership and supervision, and Samples and logistics:**

Prof Rory N Gunson PhD, FRCPath <sup>55</sup>

**Funding acquisition, Leadership and supervision, and Sequencing and analysis:**

Dr Simon Cottrell PhD <sup>74</sup>, Dr Justin O'Grady PhD <sup>75,103</sup> and Prof Dominic Kwiatkowski PhD <sup>116,108</sup>

**Leadership and supervision, Metadata curation, and Project administration:**

Dr Patrick J Lillie PhD, FRCP <sup>37</sup>

**Leadership and supervision, Metadata curation, and Samples and logistics:**

Dr Nicholas Cortes MBCHB <sup>33</sup>, Dr Nathan Moore MBCHB <sup>33</sup>, Dr Claire Thomas DPhil <sup>33</sup>, Phillipa J Burns MSc, DipRCPPath <sup>37</sup>, Dr Tabitha W Mahungu FRCPath <sup>80</sup> and Steven Liggett BSc <sup>86</sup>

**Leadership and supervision, Metadata curation, and Sequencing and analysis:**

Angela H Beckett MSc <sup>13,81</sup> and Prof Matthew TG Holden PhD <sup>73</sup>

**Leadership and supervision, Project administration, and Samples and logistics:**

Dr Lisa J Levett PhD <sup>34</sup>, Dr Husam Osman PhD <sup>70,35</sup> and Dr Mohammed O Hassan-Ibrahim PhD, FRCPath <sup>99</sup>

**Leadership and supervision, Project administration, and Sequencing and analysis:**

Dr David A Simpson PhD <sup>77</sup>

**Leadership and supervision, Samples and logistics, and Sequencing and analysis:**

Dr Meera Chand PhD <sup>72</sup>, Prof Ravi K Gupta PhD <sup>102</sup>, Prof Alistair C Darby PhD <sup>107</sup> and Prof Steve Paterson PhD <sup>107</sup>

**Leadership and supervision, Sequencing and analysis, and Software and analysis tools:**

Prof Oliver G Pybus DPhil <sup>23</sup>, Dr Erik M Volz PhD <sup>39</sup>, Prof Daniela de Angelis PhD <sup>52</sup>, Prof David L Robertson PhD <sup>53</sup>, Dr Andrew J Page PhD <sup>75</sup> and Dr Inigo Martincorena PhD <sup>116</sup>

**Leadership and supervision, Sequencing and analysis, and Visualisation:**

Dr Louise Aigrain PhD <sup>116</sup> and Dr Andrew R Bassett PhD <sup>116</sup>

**Metadata curation, Project administration, and Samples and logistics:**

Dr Nick Wong DPhil, MRCP, FRCPath <sup>50</sup>, Dr Yusri Taha MD, PhD <sup>89</sup>, Michelle J Erkiert BA <sup>99</sup> and Dr Michael H Spencer Chapman MBBS <sup>116,102</sup>

**Metadata curation, Project administration, and Sequencing and analysis:**

Dr Rebecca Dewar PhD <sup>56</sup> and Martin P McHugh MSc <sup>56,111</sup>

**Metadata curation, Project administration, and Software and analysis tools:**

Siddharth Mookerjee MPH <sup>38,57</sup>

**Metadata curation, Project administration, and Visualisation:**

Stephen Aplin<sup>97</sup>, Matthew Harvey<sup>97</sup>, Thea Sass<sup>97</sup>, Dr Helen Umpleby FRCP<sup>97</sup> and Helen Wheeler<sup>97</sup>

**Metadata curation, Samples and logistics, and Sequencing and analysis:**

Dr James P McKenna PhD<sup>3</sup>, Dr Ben Warne MRCP<sup>9</sup>, Joshua F Taylor MSc<sup>22</sup>, Yasmin Chaudhry BSc<sup>24</sup>, Rhys Izuagbe<sup>24</sup>, Dr Aminu S Jahun PhD<sup>24</sup>, Dr Gregory R Young PhD<sup>36,65</sup>, Dr Claire McMurray PhD<sup>43</sup>, Dr Clare M McCann PhD<sup>65,66</sup>, Dr Andrew Nelson PhD<sup>65,66</sup> and Scott Elliott<sup>68</sup>

**Metadata curation, Samples and logistics, and Visualisation:**

Hannah Lowe MSc<sup>25</sup>

**Metadata curation, Sequencing and analysis, and Software and analysis tools:**

Dr Anna Price PhD<sup>11</sup>, Matthew R Crown BSc<sup>65</sup>, Dr Sara Rey PhD<sup>74</sup>, Dr Sunando Roy PhD<sup>96</sup> and Dr Ben Temperton PhD<sup>105</sup>

**Metadata curation, Sequencing and analysis, and Visualisation:**

Dr Sharif Shaaban PhD<sup>73</sup> and Dr Andrew R Hesketh PhD<sup>101</sup>

**Project administration, Samples and logistics, and Sequencing and analysis:**

Dr Kenneth G Laing PhD<sup>41</sup>, Dr Irene M Monahan PhD<sup>41</sup> and Dr Judith Heaney PhD<sup>95,96,34</sup>

**Project administration, Samples and logistics, and Visualisation:**

Dr Emanuela Pelosi FRCPATH<sup>97</sup>, Siona Silvieira MSc<sup>97</sup> and Dr Eleri Wilson-Davies MD, FRCPATH<sup>97</sup>

**Samples and logistics, Software and analysis tools, and Visualisation:**

Dr Helen Fryer PhD<sup>5</sup>

**Sequencing and analysis, Software and analysis tools, and Visualization:**

Dr Helen Adams PhD<sup>4</sup>, Dr Louis du Plessis PhD<sup>23</sup>, Dr Rob Johnson PhD<sup>39</sup>, Dr William T Harvey PhD<sup>53,42</sup>, Dr Joseph Hughes PhD<sup>53</sup>, Dr Richard J Orton PhD<sup>53</sup>, Dr Lewis G Spurgin PhD<sup>59</sup>, Dr Yann Bourgeois PhD<sup>81</sup>, Dr Chris Ruis PhD<sup>102</sup>, Áine O'Toole MSc<sup>104</sup>, Marina Gourtovaia MSc<sup>116</sup> and Dr Theo Sanderson PhD<sup>116</sup>

**Funding acquisition, and Leadership and supervision:**

Dr Christophe Fraser PhD<sup>5</sup>, Dr Jonathan Edgeworth PhD, FRCPATH<sup>12</sup>, Prof Judith Breuer MD<sup>96,29</sup>, Dr Stephen L Michell PhD<sup>105</sup> and Prof John A Todd PhD<sup>115</sup>

**Funding acquisition, and Project administration:**

Michaela John BSc<sup>10</sup> and Dr David Buck PhD<sup>115</sup>

**Leadership and supervision, and Metadata curation:**

Dr Kavitha Gajee MBBS, FRCPATH<sup>37</sup> and Dr Gemma L Kay PhD<sup>75</sup>

**Leadership and supervision, and Project administration:**

Prof Sharon J Peacock PhD<sup>20,70</sup> and David Heyburn<sup>74</sup>

**Leadership and supervision, and Samples and logistics:**

Katie Kitchman BSc<sup>37</sup>, Prof Alan McNally PhD<sup>43,93</sup>, David T Pritchard MSc, CSci<sup>50</sup>, Dr Samir Dervisevic FRCPATH<sup>58</sup>, Dr Peter Muir PhD<sup>70</sup>, Dr Esther Robinson PhD<sup>70,35</sup>, Dr Barry B Vipond

PhD <sup>70</sup>, Newara A Ramadan MSc, CSci, FIBMS <sup>78</sup>, Dr Christopher Jeanes MBBS <sup>90</sup>, Danni Weldon BSc <sup>116</sup>, Jana Catalan MSc <sup>118</sup> and Neil Jones MSc <sup>118</sup>

#### **Leadership and supervision, and Sequencing and analysis:**

Dr Ana da Silva Filipe PhD <sup>53</sup>, Dr Chris Williams MBBS <sup>74</sup>, Marc Fuchs BSc <sup>77</sup>, Dr Julia Miskelly PhD <sup>77</sup>, Dr Aaron R Jeffries PhD <sup>105</sup>, Karen Oliver BSc <sup>116</sup> and Dr Naomi R Park PhD <sup>116</sup>

#### **Metadata curation, and Samples and logistics:**

Amy Ash BSc <sup>1</sup>, Cherian Koshy MSc, CSci, FIBMS <sup>1</sup>, Magdalena Barrow <sup>7</sup>, Dr Sarah L Buchan PhD <sup>7</sup>, Dr Anna Mantzouratou PhD <sup>7</sup>, Dr Gemma Clark PhD <sup>15</sup>, Dr Christopher W Holmes PhD <sup>16</sup>, Sharon Campbell MSc <sup>17</sup>, Thomas Davis MSc <sup>21</sup>, Ngee Keong Tan MSc <sup>22</sup>, Dr Julianne R Brown PhD <sup>29</sup>, Dr Kathryn A Harris PhD <sup>29,2</sup>, Stephen P Kidd MSc <sup>33</sup>, Dr Paul R Grant PhD <sup>34</sup>, Dr Li Xu-McCrae PhD <sup>35</sup>, Dr Alison Cox PhD <sup>38,63</sup>, PINGLATHEE MADONA <sup>38,63</sup>, Dr Marcus Pond PhD <sup>38,63</sup>, Dr Paul A Randell MBBCh <sup>38,63</sup>, Karen T Withell FIBMS <sup>48</sup>, Cheryl Williams MSc <sup>51</sup>, Dr Clive Graham MD <sup>60</sup>, Rebecca Denton-Smith BSc <sup>62</sup>, Emma Swindells BSc <sup>62</sup>, Robyn Turnbull BSc <sup>62</sup>, Dr Tim J Sloan PhD <sup>67</sup>, Dr Andrew Bosworth PhD <sup>70,35</sup>, Stephanie Hutchings <sup>70</sup>, Hannah M Pymont MSc <sup>70</sup>, Dr Anna Casey PhD <sup>76</sup>, Dr Liz Ratcliffe PhD <sup>76</sup>, Dr Christopher R Jones PhD <sup>79,105</sup>, Dr Bridget A Knight PhD <sup>79,105</sup>, Dr Tanzina Haque PhD, FRCPath <sup>80</sup>, Dr Jennifer Hart MRCP <sup>80</sup>, Dr Dianne Irish-Tavares FRCPath <sup>80</sup>, Eric Witele MSc <sup>80</sup>, Craig Mower BA <sup>86</sup>, Louisa K Watson DipHE <sup>86</sup>, Jennifer Collins BSc <sup>89</sup>, Gary Eltringham BSc <sup>89</sup>, Dorian Crudgington <sup>98</sup>, Ben Macklin <sup>98</sup>, Prof Miren Iturriza-Gomara PhD <sup>107</sup>, Dr Anita O Lucaci PhD <sup>107</sup> and Dr Patrick C McClure PhD <sup>113</sup>

#### **Metadata curation, and Sequencing and analysis:**

Matthew Carlile BSc <sup>18</sup>, Dr Nadine Holmes PhD <sup>18</sup>, Dr Christopher Moore PhD <sup>18</sup>, Dr Nathaniel Storey PhD <sup>29</sup>, Dr Stefan Rooke PhD <sup>73</sup>, Dr Gonzalo Yebra PhD <sup>73</sup>, Dr Noel Craine DPhil <sup>74</sup>, Malorie Perry MSc <sup>74</sup>, Dr Nabil-Fareed Alikhan PhD <sup>75</sup>, Dr Stephen Bridgett PhD <sup>77</sup>, Kate F Cook MScR <sup>84</sup>, Christopher Fearn MSc <sup>84</sup>, Dr Salman Goudarzi PhD <sup>84</sup>, Prof Ronan A Lyons MD <sup>88</sup>, Dr Thomas Williams MD <sup>104</sup>, Dr Sam T Haldenby PhD <sup>107</sup>, Jillian Durham BSc <sup>116</sup> and Dr Steven Leonard PhD <sup>116</sup>

#### **Metadata curation, and Software and analysis tools:**

Robert M Davies MA (Cantab) <sup>116</sup>

#### **Project administration, and Samples and logistics:**

Dr Rahul Batra MD <sup>12</sup>, Beth Blane BSc <sup>20</sup>, Dr Moira J Spyer PhD <sup>30,95,96</sup>, Perminder Smith MSc <sup>32,112</sup>, Mehmet Yavus <sup>85,109</sup>, Dr Rachel J Williams PhD <sup>96</sup>, Dr Adhyana IK Mahanama MD <sup>97</sup>, Dr Buddhini Samaraweera MD <sup>97</sup>, Sophia T Girgis MSc <sup>102</sup>, Samantha E Hansford CSci <sup>109</sup>, Dr Angie Green PhD <sup>115</sup>, Dr Charlotte Beaver PhD <sup>116</sup>, Katherine L Bellis <sup>116,102</sup>, Matthew J Dorman <sup>116</sup>, Sally Kay <sup>116</sup>, Liam Prestwood <sup>116</sup> and Dr Shavanthi Rajatileka PhD <sup>116</sup>

#### **Project administration, and Sequencing and analysis:**

Dr Joshua Quick PhD <sup>43</sup>

#### **Project administration, and Software and analysis tools:**

Radoslaw Poplawski BSc <sup>43</sup>

#### **Samples and logistics, and Sequencing and analysis:**

Dr Nicola Reynolds PhD <sup>8</sup>, Andrew Mack MPhil <sup>11</sup>, Dr Arthur Morriss PhD <sup>11</sup>, Thomas Whalley BSc <sup>11</sup>, Bindi Patel BSc <sup>12</sup>, Dr Iliana Georgana PhD <sup>24</sup>, Dr Myra Hosmillo PhD <sup>24</sup>, Malte L Pinckert MPhil <sup>24</sup>, Dr Joanne Stockton PhD <sup>43</sup>, Dr John H Henderson PhD <sup>65</sup>, Amy Hollis HND <sup>65</sup>, Dr William Stanley PhD <sup>65</sup>, Dr Wen C Yew PhD <sup>65</sup>, Dr Richard Myers PhD <sup>72</sup>, Dr Alicia Thornton PhD <sup>72</sup>, Alexander Adams BSc <sup>74</sup>, Tara Annett BSc <sup>74</sup>, Dr Hibo Asad PhD <sup>74</sup>, Alec Birchley MSc <sup>74</sup>, Jason

Coombes BSc<sup>74</sup>, Johnathan M Evans MSc<sup>74</sup>, Laia Fina<sup>74</sup>, Bree Gatica-Wilcox MPhil<sup>74</sup>, Lauren Gilbert<sup>74</sup>, Lee Graham BSc<sup>74</sup>, Jessica Hey BSc<sup>74</sup>, Ember Hilvers MPH<sup>74</sup>, Sophie Jones MSc<sup>74</sup>, Hannah Jones<sup>74</sup>, Sara Kumziene-Summerhayes MSc<sup>74</sup>, Dr Caoimhe McKerr PhD<sup>74</sup>, Jessica Powell BSc<sup>74</sup>, Georgia Pugh<sup>74</sup>, Sarah Taylor<sup>74</sup>, Alexander J Trotter MRes<sup>75</sup>, Charlotte A Williams BSc<sup>96</sup>, Leanne M Kermack MSc<sup>102</sup>, Benjamin H Foulkes MSc<sup>109</sup>, Marta Gallis MSc<sup>109</sup>, Hailey R Hornsby MSc<sup>109</sup>, Stavroula F Louka MSc<sup>109</sup>, Dr Manoj Pohare PhD<sup>109</sup>, Paige Wolverson MSc<sup>109</sup>, Peijun Zhang MSc<sup>109</sup>, George MacIntyre-Cockett BSc<sup>115</sup>, Amy Trebes MSc<sup>115</sup>, Dr Robin J Moll PhD<sup>116</sup>, Lynne Ferguson MSc<sup>117</sup>, Dr Emily J Goldstein PhD<sup>117</sup>, Dr Alasdair Maclean PhD<sup>117</sup> and Dr Rachael Tomb PhD<sup>117</sup>

#### **Samples and logistics, and Software and analysis tools:**

Dr Igor Starinskij MSc, MRCP<sup>53</sup>

#### **Sequencing and analysis, and Software and analysis tools:**

Laura Thomson BSc<sup>5</sup>, Joel Southgate MSc<sup>11,74</sup>, Dr Moritz UG Kraemer DPhil<sup>23</sup>, Dr Jayna Raghvani PhD<sup>23</sup>, Dr Alex E Zarebski PhD<sup>23</sup>, Olivia Boyd MSc<sup>39</sup>, Lily Geidelberg MSc<sup>39</sup>, Dr Chris J Illingworth PhD<sup>52</sup>, Dr Chris Jackson PhD<sup>52</sup>, Dr David Pascall PhD<sup>52</sup>, Dr Sreenu Vattipally PhD<sup>53</sup>, Timothy M Freeman MPhil<sup>109</sup>, Dr Sharon N Hsu PhD<sup>109</sup>, Dr Benjamin B Lindsey MRCP<sup>109</sup>, Dr Keith James PhD<sup>116</sup>, Kevin Lewis<sup>116</sup>, Gerry Tonkin-Hill<sup>116</sup> and Dr Jaime M Tovar-Corona PhD<sup>116</sup>

#### **Sequencing and analysis, and Visualisation:**

MacGregor Cox MSci<sup>20</sup>

#### **Software and analysis tools, and Visualisation:**

Dr Khalil Abudahab PhD<sup>14,116</sup>, Mirko Menegazzo<sup>14</sup>, Ben EW Taylor MEng<sup>14,116</sup>, Dr Corin A Yeats PhD<sup>14</sup>, Afrida Mukaddas BTech<sup>53</sup>, Derek W Wright MSc<sup>53</sup>, Dr Leonardo de Oliveira Martins PhD<sup>75</sup>, Dr Rachel Colquhoun DPhil<sup>104</sup>, Verity Hill<sup>104</sup>, Dr Ben Jackson PhD<sup>104</sup>, Dr JT McCrone PhD<sup>104</sup>, Dr Nathan Medd PhD<sup>104</sup>, Dr Emily Scher PhD<sup>104</sup> and Jon-Paul Keatley<sup>116</sup>

#### **Leadership and supervision:**

Dr Tanya Curran PhD<sup>3</sup>, Dr Sian Morgan FRCPath<sup>10</sup>, Prof Patrick Maxwell PhD<sup>20</sup>, Prof Ken Smith PhD<sup>20</sup>, Dr Sahar Eldirdiri MBBS, MSc, FRCPath<sup>21</sup>, Anita Kenyon MSc<sup>21</sup>, Prof Alison H Holmes MD<sup>38,57</sup>, Dr James R Price PhD<sup>38,57</sup>, Dr Tim Wyatt PhD<sup>69</sup>, Dr Alison E Mather PhD<sup>75</sup>, Dr Timofey Skvortsov PhD<sup>77</sup> and Prof John A Hartley PhD<sup>96</sup>

#### **Metadata curation:**

Prof Martyn Guest PhD<sup>11</sup>, Dr Christine Kitchen PhD<sup>11</sup>, Dr Ian Merrick PhD<sup>11</sup>, Robert Munn BSc<sup>11</sup>, Dr Beatrice Bertolusso Degree<sup>33</sup>, Dr Jessica Lynch MBCHB<sup>33</sup>, Dr Gabrielle Vernet MBBS<sup>33</sup>, Stuart Kirk MSc<sup>34</sup>, Dr Elizabeth Wastnedge MD<sup>56</sup>, Dr Rachael Stanley PhD<sup>58</sup>, Giles Idle<sup>64</sup>, Dr Declan T Bradley PhD<sup>69,77</sup>, Dr Jennifer Poyner MD<sup>79</sup> and Matilde Mori BSc<sup>110</sup>

#### **Project administration:**

Owen Jones BSc<sup>11</sup>, Victoria Wright BSc<sup>18</sup>, Ellena Brooks MA<sup>20</sup>, Carol M Churcher BSc<sup>20</sup>, Mireille Fragakis HND<sup>20</sup>, Dr Katerina Galai PhD<sup>20,70</sup>, Dr Andrew Jermy PhD<sup>20</sup>, Sarah Judges BA<sup>20</sup>, Georgina M McManus BSc<sup>20</sup>, Kim S Smith<sup>20</sup>, Dr Elaine Westwick PhD<sup>20</sup>, Dr Stephen W Attwood PhD<sup>23</sup>, Dr Frances Bolt PhD<sup>38,57</sup>, Dr Alisha Davies PhD<sup>74</sup>, Elen De Lacy MPH<sup>74</sup>, Fatima Downing<sup>74</sup>, Sue Edwards<sup>74</sup>, Lizzie Meadows MA<sup>75</sup>, Sarah Jeremiah MSc<sup>97</sup>, Dr Nikki Smith PhD<sup>109</sup> and Luke Foulser<sup>116</sup>

#### **Samples and logistics:**



Dr Themoula Charalampous PhD <sup>12,46</sup>, Amita Patel BSc <sup>12</sup>, Dr Louise Berry PhD <sup>15</sup>, Dr Tim Boswell PhD <sup>15</sup>, Dr Vicki M Fleming PhD <sup>15</sup>, Dr Hannah C Howson-Wells PhD <sup>15</sup>, Dr Amelia Joseph PhD <sup>15</sup>, Manjinder Khakh <sup>15</sup>, Dr Michelle M Lister PhD <sup>15</sup>, Paul W Bird MSc, MRes <sup>16</sup>, Karlie Fallon <sup>16</sup>, Thomas Helmer <sup>16</sup>, Dr Claire L McMurray PhD <sup>16</sup>, Mina Odedra BSc <sup>16</sup>, Jessica Shaw BSc <sup>16</sup>, Dr Julian W Tang PhD <sup>16</sup>, Nicholas J Willford MSc <sup>16</sup>, Victoria Blakey BSc <sup>17</sup>, Dr Veena Raviprakash MD <sup>17</sup>, Nicola Sheriff BSc <sup>17</sup>, Lesley-Anne Williams BSc <sup>17</sup>, Theresa Feltwell MSc <sup>20</sup>, Dr Luke Bedford PhD <sup>26</sup>, Dr James S Cargill PhD <sup>27</sup>, Warwick Hughes MSc <sup>27</sup>, Dr Jonathan Moore MD <sup>28</sup>, Susanne Stonehouse BSc <sup>28</sup>, Laura Atkinson MSc <sup>29</sup>, Jack CD Lee MSc <sup>29</sup>, Dr Divya Shah PhD <sup>29</sup>, Adela Alcolea-Medina Clinical scientist <sup>32,112</sup>, Natasha Ohemeng-Kumi MSc <sup>32,112</sup>, John Ramble MSc <sup>32,112</sup>, Jasveen Sehmi MSc <sup>32,112</sup>, Dr Rebecca Williams BMBS <sup>33</sup>, Wendy Chatterton MSc <sup>34</sup>, Monika Pusok MSc <sup>34</sup>, William Everson MSc <sup>37</sup>, Anibolina Castigador IBMS HCPC <sup>44</sup>, Emily Macnaughton FRCPath <sup>44</sup>, Dr Kate El Bouzidi MRCP <sup>45</sup>, Dr Temi Lampejo FRCPath <sup>45</sup>, Dr Malur Sudhanva FRCPath <sup>45</sup>, Cassie Breen BSc <sup>47</sup>, Dr Graciela Sluga MD, MSc <sup>48</sup>, Dr Shazaad SY Ahmad MSc <sup>49,70</sup>, Dr Ryan P George PhD <sup>49</sup>, Dr Nicholas W Machin MSc <sup>49,70</sup>, Debbie Binns BSc <sup>50</sup>, Victoria James BSc <sup>50</sup>, Dr Rachel Blacow MBCHB <sup>55</sup>, Dr Lindsay Coupland PhD <sup>58</sup>, Dr Louise Smith PhD <sup>59</sup>, Dr Edward Barton MD <sup>60</sup>, Debra Padgett BSc <sup>60</sup>, Garren Scott BSc <sup>60</sup>, Dr Aidan Cross MBCHB <sup>61</sup>, Dr Mariyam Mirfenderesky FRCPath <sup>61</sup>, Jane Greenaway MSc <sup>62</sup>, Kevin Cole <sup>64</sup>, Phillip Clarke <sup>67</sup>, Nichola Duckworth <sup>67</sup>, Sarah Walsh <sup>67</sup>, Kelly Bicknell <sup>68</sup>, Robert Impey MSc <sup>68</sup>, Dr Sarah Wyllie PhD <sup>68</sup>, Richard Hopes <sup>70</sup>, Dr Chloe Bishop PhD <sup>72</sup>, Dr Vicki Chalker PhD <sup>72</sup>, Dr Ian Harrison PhD <sup>72</sup>, Laura Gifford MSc <sup>74</sup>, Dr Zoltan Molnar PhD <sup>77</sup>, Dr Cressida Auckland FRCPath <sup>79</sup>, Dr Cariad Evans PhD <sup>85,109</sup>, Dr Kate Johnson PhD <sup>85,109</sup>, Dr David G Partridge FRCP, FRCPath <sup>85,109</sup>, Dr Mohammad Raza PhD <sup>85,109</sup>, Paul Baker MD <sup>86</sup>, Prof Stephen Bonner PhD <sup>86</sup>, Sarah Essex <sup>86</sup>, Leanne J Murray <sup>86</sup>, Andrew I Lawton MSc <sup>87</sup>, Dr Shirelle Burton-Fanning MD <sup>89</sup>, Dr Brendan AI Payne MD <sup>89</sup>, Dr Sheila Waugh MD <sup>89</sup>, Andrea N Gomes MSc <sup>91</sup>, Maimuna Kimuli MSc <sup>91</sup>, Darren R Murray MSc <sup>91</sup>, Paula Ashfield MSc <sup>92</sup>, Dr Donald Dobie MBCHB <sup>92</sup>, Dr Fiona Ashford PhD <sup>93</sup>, Dr Angus Best PhD <sup>93</sup>, Dr Liam Crawford PhD <sup>93</sup>, Dr Nicola Cumley PhD <sup>93</sup>, Dr Megan Mayhew PhD <sup>93</sup>, Dr Oliver Megram PhD <sup>93</sup>, Dr Jeremy Mirza PhD <sup>93</sup>, Dr Emma Moles-Garcia PhD <sup>93</sup>, Dr Benita Percival PhD <sup>93</sup>, Megan Driscoll BSc <sup>96</sup>, Leah Ensell BSc <sup>96</sup>, Dr Helen L Lowe PhD <sup>96</sup>, Laurentiu Maftai BSc <sup>96</sup>, Matteo Mondani MSc <sup>96</sup>, Nicola J Chaloner BSc <sup>99</sup>, Benjamin J Cogger BSc <sup>99</sup>, Lisa J Easton MSc <sup>99</sup>, Hannah Huckson BSc <sup>99</sup>, Jonathan Lewis MSc, PgD, FIBMS <sup>99</sup>, Sarah Lowdon BSc <sup>99</sup>, Cassandra S Malone MSc <sup>99</sup>, Florence Munemo BSc <sup>99</sup>, Manasa Mutingwende MSc <sup>99</sup>, Roberto Nicodemi BSc <sup>99</sup>, Olga Podplomyk FD <sup>99</sup>, Thomas Somassa BSc <sup>99</sup>, Dr Andrew Beggs PhD <sup>100</sup>, Dr Alex Richter PhD <sup>100</sup>, Claire Cormie <sup>102</sup>, Joana Dias MSc <sup>102</sup>, Sally Forrest BSc <sup>102</sup>, Dr Ellen E Higginson PhD <sup>102</sup>, Mailis Maes MPhil <sup>102</sup>, Jamie Young BSc <sup>102</sup>, Dr Rose K Davidson PhD <sup>103</sup>, Kathryn A Jackson MSc <sup>107</sup>, Dr Lance Turtle PhD, MRCP <sup>107</sup>, Dr Alexander J Keeley MRCP <sup>109</sup>, Prof Jonathan Ball PhD <sup>113</sup>, Timothy Byaruhanga MSc <sup>113</sup>, Dr Joseph G Chappell PhD <sup>113</sup>, Jayasree Dey MSc <sup>113</sup>, Jack D Hill MSc <sup>113</sup>, Emily J Park MSc <sup>113</sup>, Arezou Fanaie MSc <sup>114</sup>, Rachel A Hilson MSc <sup>114</sup>, Geraldine Yaze MSc <sup>114</sup> and Stephanie Lo <sup>116</sup>

### **Sequencing and analysis:**

Safiah Afifi BSc <sup>10</sup>, Robert Beer BSc <sup>10</sup>, Joshua Maksimovic FD <sup>10</sup>, Kathryn McCluggage Masters <sup>10</sup>, Karla Spellman FD <sup>10</sup>, Catherine Bresner BSc <sup>11</sup>, William Fuller BSc <sup>11</sup>, Dr Angela Marchbank BSc <sup>11</sup>, Trudy Workman HNC <sup>11</sup>, Dr Ekaterina Shelest PhD <sup>13,81</sup>, Dr Johnny Debebe PhD <sup>18</sup>, Dr Fei Sang PhD <sup>18</sup>, Dr Marina Escalera Zamudio PhD <sup>23</sup>, Dr Sarah Francois PhD <sup>23</sup>, Bernardo Gutierrez MSc <sup>23</sup>, Dr Tetyana I Vasylyeva DPhil <sup>23</sup>, Dr Flavia Flaviani PhD <sup>31</sup>, Dr Manon Ragonnet-Cronin PhD <sup>39</sup>, Dr Katherine L Smollett PhD <sup>42</sup>, Alice Broos BSc <sup>53</sup>, Daniel Mair BSc <sup>53</sup>, Jenna Nichols BSc <sup>53</sup>, Dr Kyriaki Nomikou PhD <sup>53</sup>, Dr Lily Tong PhD <sup>53</sup>, Ioulia Tsatsani MSc <sup>53</sup>, Prof Sarah O'Brien PhD <sup>54</sup>, Prof Steven Rushton PhD <sup>54</sup>, Dr Roy Sanderson PhD <sup>54</sup>, Dr Jon Perkins MBCHB <sup>55</sup>, Seb Cotton MSc <sup>56</sup>, Abbie Gallagher BSc <sup>56</sup>, Dr Elias Allara MD, PhD <sup>70,102</sup>, Clare Pearson MSc <sup>70,102</sup>, Dr David Bibby PhD <sup>72</sup>, Dr Gavin Dabrera PhD <sup>72</sup>, Dr Nicholas Ellaby PhD <sup>72</sup>, Dr Eileen Gallagher PhD <sup>72</sup>, Dr Jonathan Hubb PhD <sup>72</sup>, Dr Angie Lackenby PhD <sup>72</sup>, Dr David Lee PhD <sup>72</sup>, Nikos Manesis <sup>72</sup>, Dr Tamyo Mbisa PhD <sup>72</sup>, Dr Steven Platt PhD <sup>72</sup>, Katherine A Twohig <sup>72</sup>, Dr Mari Morgan PhD <sup>74</sup>, Alp

Aydin MSci <sup>75</sup>, David J Baker BEng <sup>75</sup>, Dr Ebenezer Foster-Nyarko PhD <sup>75</sup>, Dr Sophie J Prosolek PhD <sup>75</sup>, Steven Rudder <sup>75</sup>, Chris Baxter BSc <sup>77</sup>, Sílvia F Carvalho MSc <sup>77</sup>, Dr Deborah Lavin PhD <sup>77</sup>, Dr Arun Mariappan PhD <sup>77</sup>, Dr Clara Radulescu PhD <sup>77</sup>, Dr Aditi Singh PhD <sup>77</sup>, Miao Tang MD <sup>77</sup>, Helen Morcrette BSc <sup>79</sup>, Nadua Bayzid BSc <sup>96</sup>, Marius Cotic MSc <sup>96</sup>, Dr Carlos E Balcazar PhD <sup>104</sup>, Dr Michael D Gallagher PhD <sup>104</sup>, Dr Daniel Maloney PhD <sup>104</sup>, Thomas D Stanton BSc <sup>104</sup>, Dr Kathleen A Williamson PhD <sup>104</sup>, Dr Robin Manley PhD <sup>105</sup>, Michelle L Michelsen BSc <sup>105</sup>, Dr Christine M Sambles PhD <sup>105</sup>, Dr David J Studholme PhD <sup>105</sup>, Joanna Warwick-Dugdale BSc <sup>105</sup>, Richard Eccles MSc <sup>107</sup>, Matthew Gemmell MSc <sup>107</sup>, Dr Richard Gregory PhD <sup>107</sup>, Dr Margaret Hughes PhD <sup>107</sup>, Charlotte Nelson MSc <sup>107</sup>, Dr Lucille Rainbow PhD <sup>107</sup>, Dr Edith E Vamos PhD <sup>107</sup>, Hermione J Webster BSc <sup>107</sup>, Dr Mark Whitehead PhD <sup>107</sup>, Claudia Wierzbicki BSc <sup>107</sup>, Dr Adrienn Angyal PhD <sup>109</sup>, Dr Luke R Green PhD <sup>109</sup>, Dr Max Whiteley PhD <sup>109</sup>, Emma Betteridge BSc <sup>116</sup>, Dr Iraad F Bronner PhD <sup>116</sup>, Ben W Farr BSc <sup>116</sup>, Scott Goodwin MSc <sup>116</sup>, Dr Stefanie V Lensing PhD <sup>116</sup>, Shane A McCarthy <sup>116,102</sup>, Dr Michael A Quail PhD <sup>116</sup>, Diana Rajan MSc <sup>116</sup>, Dr Nicholas M Redshaw PhD <sup>116</sup>, Carol Scott <sup>116</sup>, Lesley Shirley MSc <sup>116</sup> and Scott AJ Thurston BSc <sup>116</sup>

### **Software and analysis tools:**

Dr Will Rowe PhD<sup>43</sup>, Amy Gaskin MSc <sup>74</sup>, Dr Thanh Le-Viet PhD <sup>75</sup>, James Bonfield BSc <sup>116</sup>, Jennifer Liddle <sup>116</sup> and Andrew Whitwham BSc <sup>116</sup>

**1** Barking, Havering and Redbridge University Hospitals NHS Trust, **2** Barts Health NHS Trust, **3** Belfast Health & Social Care Trust, **4** Betsi Cadwaladr University Health Board, **5** Big Data Institute, Nuffield Department of Medicine, University of Oxford, **6** Blackpool Teaching Hospitals NHS Foundation Trust, **7** Bournemouth University, **8** Cambridge Stem Cell Institute, University of Cambridge, **9** Cambridge University Hospitals NHS Foundation Trust, **10** Cardiff and Vale University Health Board, **11** Cardiff University, **12** Centre for Clinical Infection and Diagnostics Research, Department of Infectious Diseases, Guy's and St Thomas' NHS Foundation Trust, **13** Centre for Enzyme Innovation, University of Portsmouth, **14** Centre for Genomic Pathogen Surveillance, University of Oxford, **15** Clinical Microbiology Department, Queens Medical Centre, Nottingham University Hospitals NHS Trust, **16** Clinical Microbiology, University Hospitals of Leicester NHS Trust, **17** County Durham and Darlington NHS Foundation Trust, **18** Deep Seq, School of Life Sciences, Queens Medical Centre, University of Nottingham, **19** Department of Infectious Diseases and Microbiology, Cambridge University Hospitals NHS Foundation Trust, **20** Department of Medicine, University of Cambridge, **21** Department of Microbiology, Kettering General Hospital, **22** Department of Microbiology, South West London Pathology, **23** Department of Zoology, University of Oxford, **24** Division of Virology, Department of Pathology, University of Cambridge, **25** East Kent Hospitals University NHS Foundation Trust, **26** East Suffolk and North Essex NHS Foundation Trust, **27** East Sussex Healthcare NHS Trust, **28** Gateshead Health NHS Foundation Trust, **29** Great Ormond Street Hospital for Children NHS Foundation Trust, **30** Great Ormond Street Institute of Child Health (GOS ICH), University College London (UCL), **31** Guy's and St. Thomas' Biomedical Research Centre, **32** Guy's and St. Thomas' NHS Foundation Trust, **33** Hampshire Hospitals NHS Foundation Trust, **34** Health Services Laboratories, **35** Heartlands Hospital, Birmingham, **36** Hub for Biotechnology in the Built Environment, Northumbria University, **37** Hull University Teaching Hospitals NHS Trust, **38** Imperial College Healthcare NHS Trust, **39** Imperial College London, **40** Infection Care Group, St George's University Hospitals NHS Foundation Trust, **41** Institute for Infection and Immunity, St George's University of London, **42** Institute of Biodiversity, Animal Health & Comparative Medicine, **43** Institute of Microbiology and Infection, University of Birmingham, **44** Isle of Wight NHS Trust, **45** King's College Hospital NHS Foundation Trust, **46** King's College London, **47** Liverpool Clinical Laboratories, **48** Maidstone and Tunbridge Wells NHS Trust, **49** Manchester University NHS Foundation Trust, **50** Microbiology Department, Buckinghamshire Healthcare NHS Trust, **51** Microbiology, Royal Oldham Hospital, **52** MRC Biostatistics Unit, University of Cambridge, **53** MRC-University of Glasgow Centre for Virus Research, **54** Newcastle University, **55** NHS Greater

Glasgow and Clyde, **56** NHS Lothian, **57** NIHR Health Protection Research Unit in HCAI and AMR, Imperial College London, **58** Norfolk and Norwich University Hospitals NHS Foundation Trust, **59** Norfolk County Council, **60** North Cumbria Integrated Care NHS Foundation Trust, **61** North Middlesex University Hospital NHS Trust, **62** North Tees and Hartlepool NHS Foundation Trust, **63** North West London Pathology, **64** Northumbria Healthcare NHS Foundation Trust, **65** Northumbria University, **66** NU-OMICS, Northumbria University, **67** Path Links, Northern Lincolnshire and Goole NHS Foundation Trust, **68** Portsmouth Hospitals University NHS Trust, **69** Public Health Agency, Northern Ireland, **70** Public Health England, **71** Public Health England, Cambridge, **72** Public Health England, Colindale, **73** Public Health Scotland, **74** Public Health Wales, **75** Quadram Institute Bioscience, **76** Queen Elizabeth Hospital, Birmingham, **77** Queen's University Belfast, **78** Royal Brompton and Harefield Hospitals, **79** Royal Devon and Exeter NHS Foundation Trust, **80** Royal Free London NHS Foundation Trust, **81** School of Biological Sciences, University of Portsmouth, **82** School of Health Sciences, University of Southampton, **83** School of Medicine, University of Southampton, **84** School of Pharmacy & Biomedical Sciences, University of Portsmouth, **85** Sheffield Teaching Hospitals NHS Foundation Trust, **86** South Tees Hospitals NHS Foundation Trust, **87** Southwest Pathology Services, **88** Swansea University, **89** The Newcastle upon Tyne Hospitals NHS Foundation Trust, **90** The Queen Elizabeth Hospital King's Lynn NHS Foundation Trust, **91** The Royal Marsden NHS Foundation Trust, **92** The Royal Wolverhampton NHS Trust, **93** Turnkey Laboratory, University of Birmingham, **94** University College London Division of Infection and Immunity, **95** University College London Hospital Advanced Pathogen Diagnostics Unit, **96** University College London Hospitals NHS Foundation Trust, **97** University Hospital Southampton NHS Foundation Trust, **98** University Hospitals Dorset NHS Foundation Trust, **99** University Hospitals Sussex NHS Foundation Trust, **100** University of Birmingham, **101** University of Brighton, **102** University of Cambridge, **103** University of East Anglia, **104** University of Edinburgh, **105** University of Exeter, **106** University of Kent, **107** University of Liverpool, **108** University of Oxford, **109** University of Sheffield, **110** University of Southampton, **111** University of St Andrews, **112** Viapath, Guy's and St Thomas' NHS Foundation Trust, and King's College Hospital NHS Foundation Trust, **113** Virology, School of Life Sciences, Queens Medical Centre, University of Nottingham, **114** Watford General Hospital, **115** Wellcome Centre for Human Genetics, Nuffield Department of Medicine, University of Oxford, **116** Wellcome Sanger Institute, **117** West of Scotland Specialist Virology Centre, NHS Greater Glasgow and Clyde, **118** Whittington Health NHS Trust

## References

- 1 Krutikov M, Palmer T, Donaldson A, *et al.* Study Protocol: Understanding SARS-Cov-2 infection, immunity and its duration in care home residents and staff in England (VIVALDI). *Wellcome Open Research* 2021 5:232 2021; **5**: 232.
- 2 NHS Digital. Hospital Episode Statistics (HES). 2022. <https://digital.nhs.uk/data-and-information/data-tools-and-services/data-services/hospital-episode-statistics> (accessed Jan 21, 2022).

- 3 NHS England. Statistics » COVID-19 Vaccinations. 2022. <https://www.england.nhs.uk/statistics/statistical-work-areas/covid-19-vaccinations/> (accessed Jan 21, 2022).
- 4 NECS. Capacity Tracker. 2022. <https://www.necsu.nhs.uk/capacity-tracker/> (accessed Jan 21, 2022).
- 5 NPEX. NPEX. 2022. <https://www.npex.nhs.uk/> (accessed Jan 21, 2022).
- 6 COG-UK. COVID-19 Genomics UK Consortium. 2022. <https://www.cogconsortium.uk/> (accessed Jan 21, 2022).

## STROBE Checklist

|                      | Item No | Recommendation                                                                                                                                                                                                                                                                                                                                                                                                                                                           | Page No |
|----------------------|---------|--------------------------------------------------------------------------------------------------------------------------------------------------------------------------------------------------------------------------------------------------------------------------------------------------------------------------------------------------------------------------------------------------------------------------------------------------------------------------|---------|
| Title and abstract   |         |                                                                                                                                                                                                                                                                                                                                                                                                                                                                          |         |
|                      | 1       | (a) Indicate the study's design with a commonly used term in the title or the abstract                                                                                                                                                                                                                                                                                                                                                                                   | 1       |
|                      |         | (b) Provide in the abstract an informative and balanced summary of what was done and what was found                                                                                                                                                                                                                                                                                                                                                                      | 2       |
| Introduction         |         |                                                                                                                                                                                                                                                                                                                                                                                                                                                                          |         |
| Background/rationale | 2       | Explain the scientific background and rationale for the investigation being reported                                                                                                                                                                                                                                                                                                                                                                                     | 4       |
| Objectives           | 3       | State specific objectives, including any prespecified hypotheses                                                                                                                                                                                                                                                                                                                                                                                                         | 4       |
| Methods              |         |                                                                                                                                                                                                                                                                                                                                                                                                                                                                          |         |
| Study design         | 4       | Present key elements of study design early in the paper                                                                                                                                                                                                                                                                                                                                                                                                                  | 4-6     |
| Setting              | 5       | Describe the setting, locations, and relevant dates, including periods of recruitment, exposure, follow-up, and data collection                                                                                                                                                                                                                                                                                                                                          | 4-6     |
| Participants         | 6       | a) <i>Cohort study</i> ? Give the eligibility criteria, and the sources and methods of selection of participants. Describe methods of follow-up<br><i>Case-control study</i> ? Give the eligibility criteria, and the sources and methods of case ascertainment and control selection. Give the rationale for the choice of cases and controls<br><i>Cross sectional study</i> ? Give the eligibility criteria, and the sources and methods of selection of participants | 4-6     |
|                      |         | (b) <i>Cohort study</i> ? For matched studies, give matching criteria and number of exposed and unexposed<br><i>Case-control study</i> ? For matched studies, give matching criteria and the number of controls per case                                                                                                                                                                                                                                                 | n/a     |

|                           |     |                                                                                                                                                                                                                                                                                                           |                      |
|---------------------------|-----|-----------------------------------------------------------------------------------------------------------------------------------------------------------------------------------------------------------------------------------------------------------------------------------------------------------|----------------------|
| Variables                 | 7   | Clearly define all outcomes, exposures, predictors, potential confounders, and effect modifiers. Give diagnostic criteria, if applicable                                                                                                                                                                  | 4-6                  |
| Data sources/ measurement | 8*  | For each variable of interest, give sources of data and details of methods of assessment (measurement). Describe comparability of assessment methods if there is more than one group                                                                                                                      | 5, appendix          |
| Bias                      | 9   | Describe any efforts to address potential sources of bias                                                                                                                                                                                                                                                 | 5, 6                 |
| Study size                | 10  | Explain how the study size was arrived at                                                                                                                                                                                                                                                                 | 6                    |
| Quantitative variables    | 11  | Explain how quantitative variables were handled in the analyses. If applicable, describe which groupings were chosen and why                                                                                                                                                                              | 6                    |
| Statistical methods       | 12  | (a) Describe all statistical methods, including those used to control for confounding                                                                                                                                                                                                                     | 6                    |
|                           |     | (b) Describe any methods used to examine subgroups and interactions                                                                                                                                                                                                                                       | 6                    |
|                           |     | (c) Explain how missing data were addressed                                                                                                                                                                                                                                                               | 5-6                  |
|                           |     | (d) <i>Cohort study?</i> If applicable, explain how loss to follow-up was addressed<br><i>Case-control study?</i> If applicable, explain how matching of cases and controls was addressed<br><i>Cross sectional study?</i> If applicable, describe analytical methods taking account of sampling strategy | 5,6                  |
|                           |     | (e) Describe any sensitivity analyses                                                                                                                                                                                                                                                                     | 4-6                  |
| Results                   |     |                                                                                                                                                                                                                                                                                                           |                      |
| Participants              | 13* | (a) Report numbers of individuals at each stage of study? eg numbers potentially eligible, examined for eligibility, confirmed eligible, included in the study, completing follow-up, and analysed                                                                                                        | 7, appendix          |
|                           |     | (b) Give reasons for non-participation at each stage                                                                                                                                                                                                                                                      | Appendix             |
|                           |     | (c) Consider use of a flow diagram                                                                                                                                                                                                                                                                        | Figure S1 (appendix) |
| Descriptive data          | 14* | (a) Give characteristics of study participants (eg demographic, clinical, social) and information on exposures and potential confounders                                                                                                                                                                  | 7, table 1, table S1 |
|                           |     | (b) Indicate number of participants with missing data for each variable of interest                                                                                                                                                                                                                       | n/a                  |
|                           |     | (c) <i>Cohort study?</i> Summarise follow-up time (eg average and total amount)                                                                                                                                                                                                                           | 7                    |
| Outcome data              | 15* | <i>Cohort study?</i> Report numbers of outcome events or summary measures over time                                                                                                                                                                                                                       | 7, 8                 |
|                           |     | <i>Case-control study?</i> Report numbers in each exposure category, or summary measures of exposure                                                                                                                                                                                                      |                      |
|                           |     | <i>Cross sectional study?</i> Report numbers of outcome events or summary measures                                                                                                                                                                                                                        |                      |
| Main results              | 16  | (a) Report the numbers of individuals at each stage of the study? eg numbers potentially eligible, examined for eligibility, confirmed eligible, included in the study, completing follow-up, and analysed                                                                                                | 7, 8, figure S1      |

|                   |    |                                                                                                                                                                            |                                |
|-------------------|----|----------------------------------------------------------------------------------------------------------------------------------------------------------------------------|--------------------------------|
|                   |    | (b) Give reasons for non-participation at each stage                                                                                                                       | 7, figure S1                   |
|                   |    | (c) Consider use of a flow diagram                                                                                                                                         | Figure S1                      |
| Other analyses    | 17 | Report other analyses done?eg analyses of subgroups and interactions, and sensitivity analyses                                                                             | 7, 8                           |
| Discussion        |    |                                                                                                                                                                            |                                |
| Key results       | 18 | Summarise key results with reference to study objectives                                                                                                                   | 8                              |
| Limitations       | 19 | Discuss limitations of the study, taking into account sources of potential bias or imprecision. Discuss both direction and magnitude of any potential bias                 | 9, 10                          |
| Interpretation    | 20 | Give a cautious overall interpretation of results considering objectives, limitations, multiplicity of analyses, results from similar studies, and other relevant evidence | 9, 10                          |
| Generalisability  | 21 | Discuss the generalisability (external validity) of the study results                                                                                                      | 9, 10                          |
| Other information |    |                                                                                                                                                                            |                                |
| Funding           | 22 | Give the source of funding and the role of the funders for the present study and, if applicable, for the original study on which the present article is based              | Declaration of funding sources |
